# Supplementary material for: Development and Validation of a Smartphone-based Contrast Sensitivity Test
Source: PubMed Central journal article supplement (PMC6743644; doi:10.1167/tvst.8.5.13), 2019-09-13

**Figure S1: 'Gamma curves' describing the relationship between the signal input to a pixel(s),  $V_{in}$ , and its relative luminance for the displays of each smartphone. The 'ideal' relationship, that with a gamma of 2.2, specified for Android devices (green line) is shown for reference.**

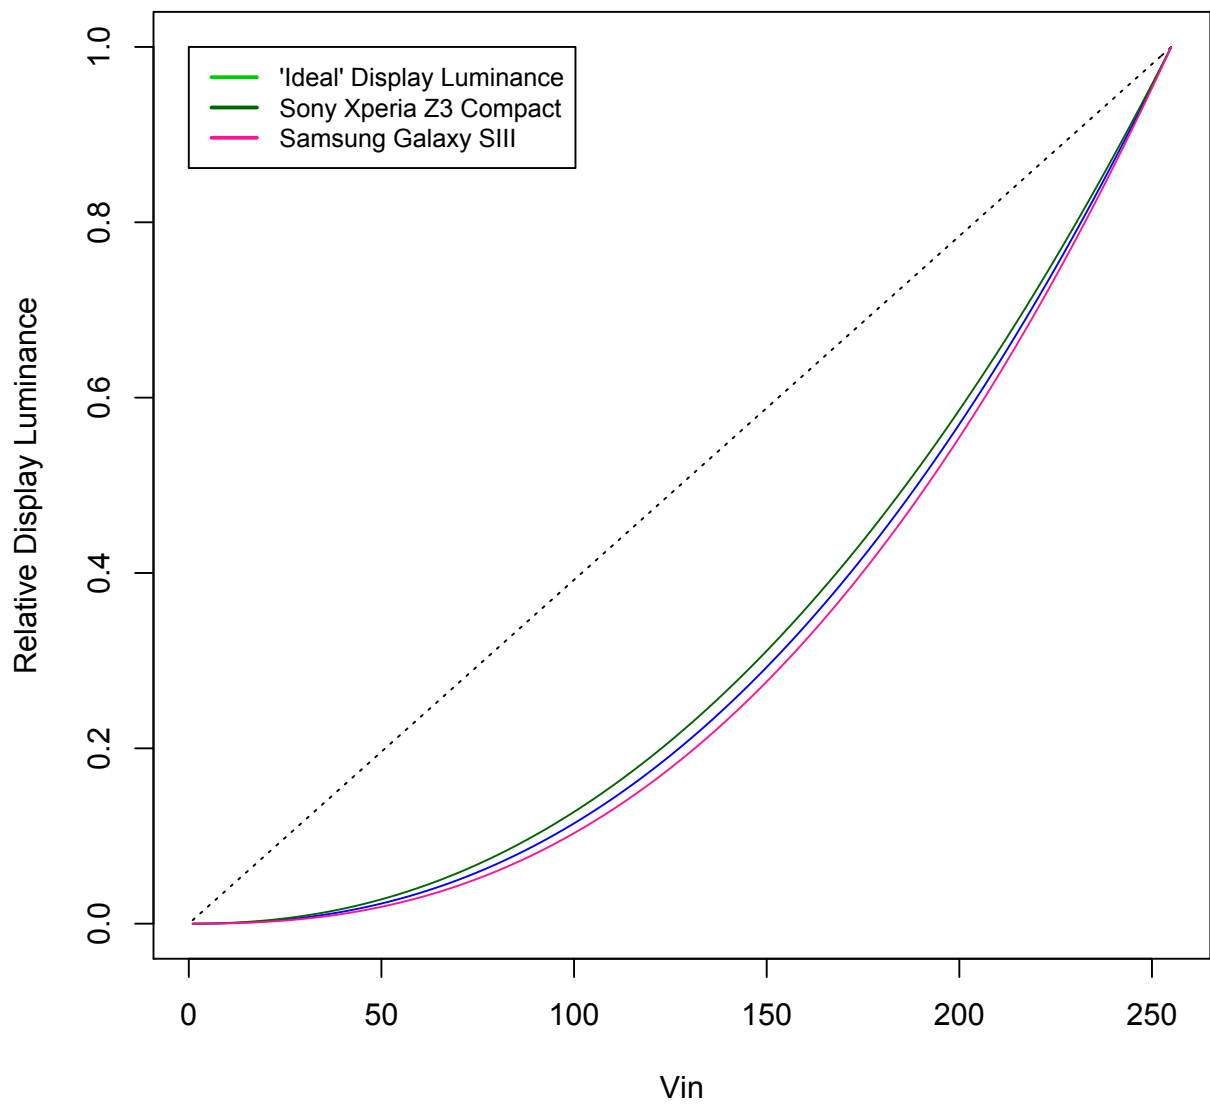

Supplement: tvst-08-04-34_s02.pdf [file tvst-08-04-34_s02.pdf]
