# Supplementary material for: Development and Validation of a Smartphone-based Contrast Sensitivity Test
Source: PubMed Central journal article supplement (PMC6743644; doi:10.1167/tvst.8.5.13), 2019-09-13

**Figure S2: Flowchart describing the logic of the PeekCS test progression.** Starting at stage 1, which has the highest contrast, the test presents tumbling Es testing for progressively higher contrast sensitivities (stages 2-15; the corresponding contrast sensitivities of which are shown in Table 1) upon the second instance where the direction of the E at a given contrast is correctly identified. In the event that the direction of two tumbling Es of the same stage cannot be identified correctly by the participant the test concludes, reporting a result equivalent to the base ten logarithm of the corresponding contrast sensitivity of the stage reached.

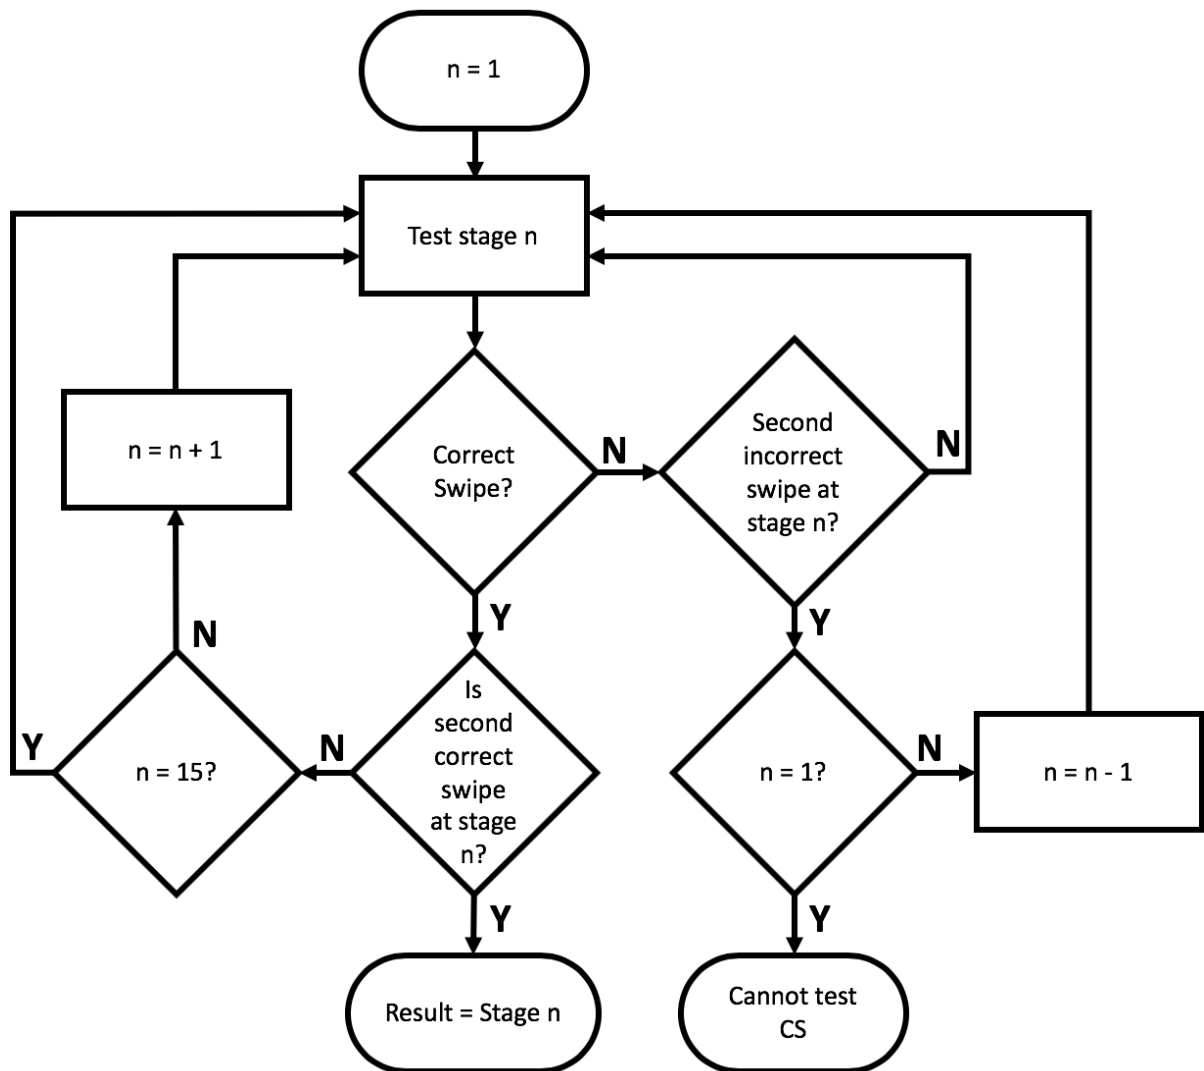

Supplement: tvst-08-04-34_s03.pdf [file tvst-08-04-34_s03.pdf]
